# Supplementary material for: Comparative Transcriptional and Genomic Analysis of Plasmodium falciparum Field Isolates
Source: PubMed Central journal article supplement (PMC2764095; doi:10.1371/journal.ppat.1000644), 2009-10-30

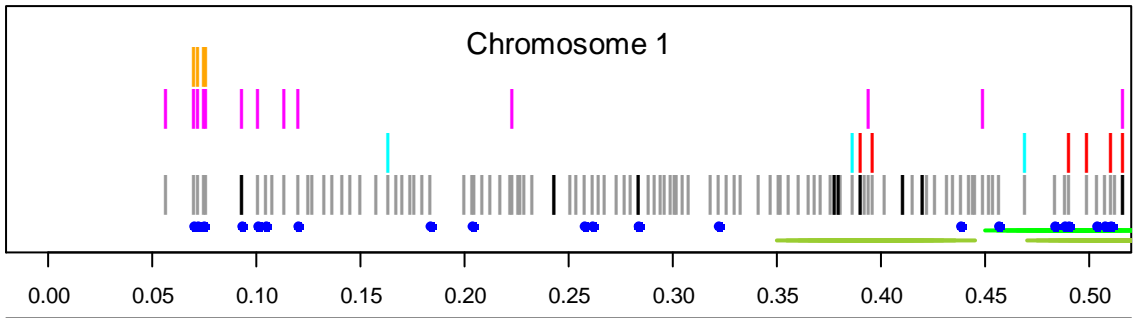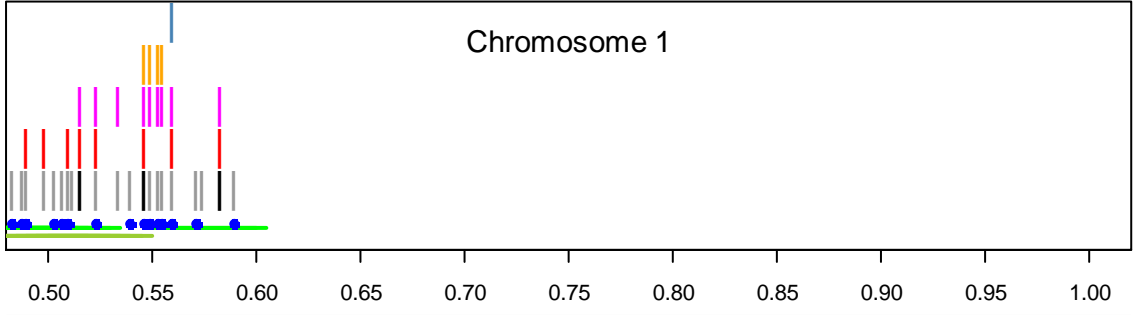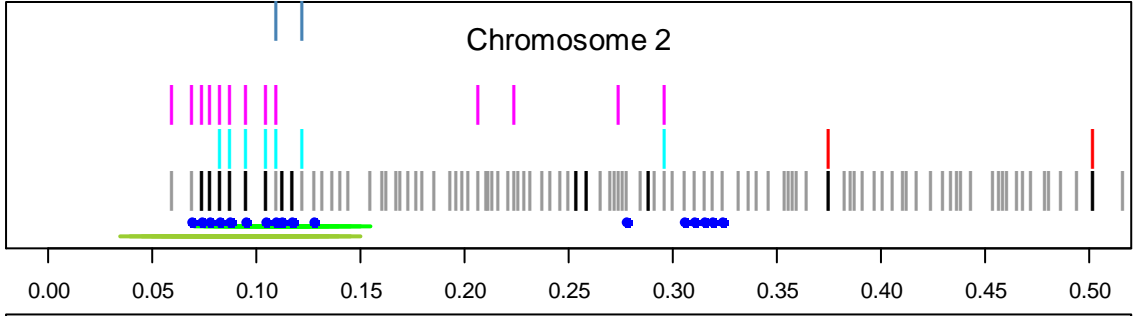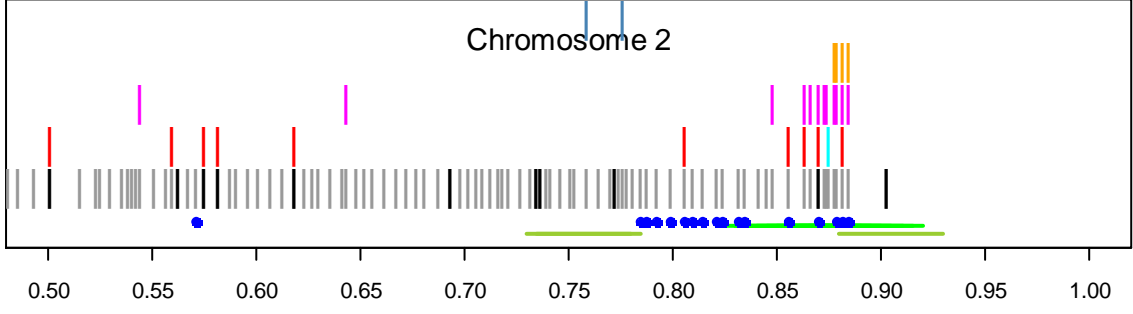

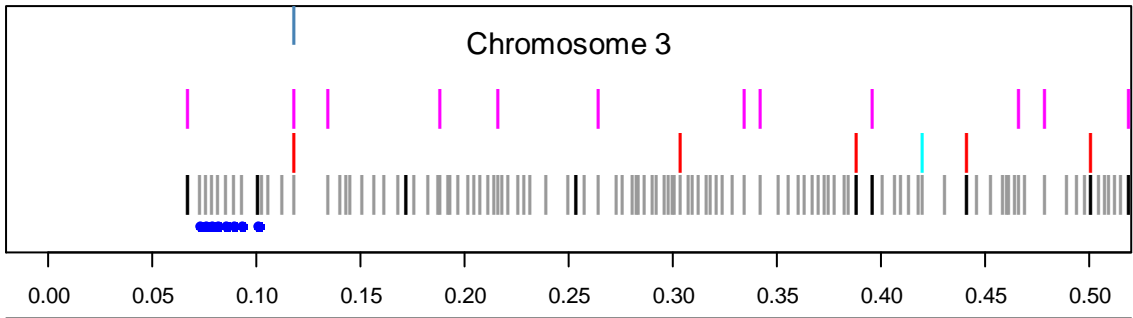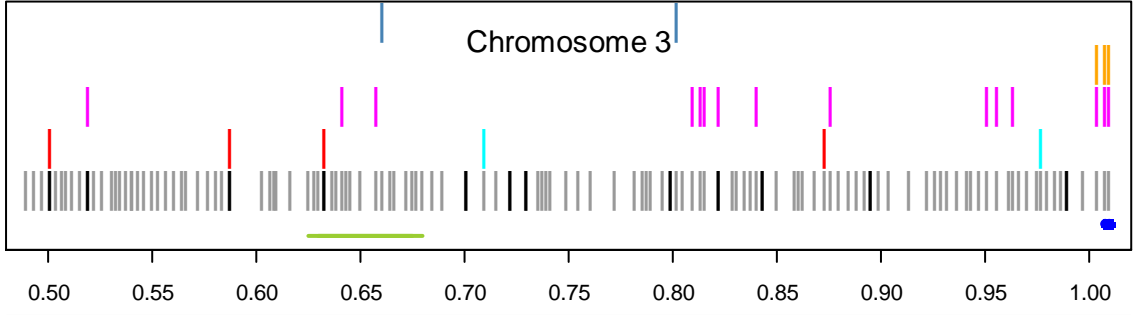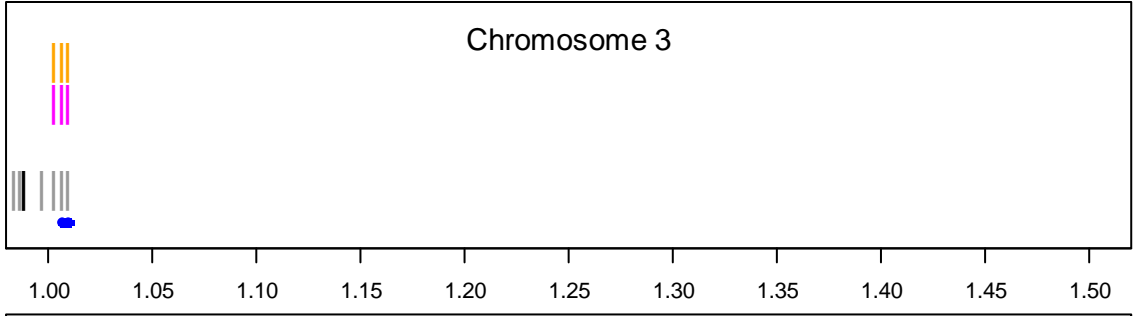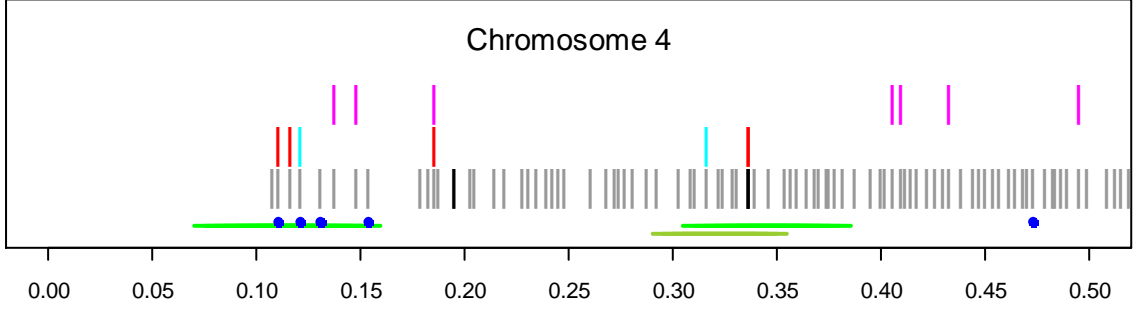

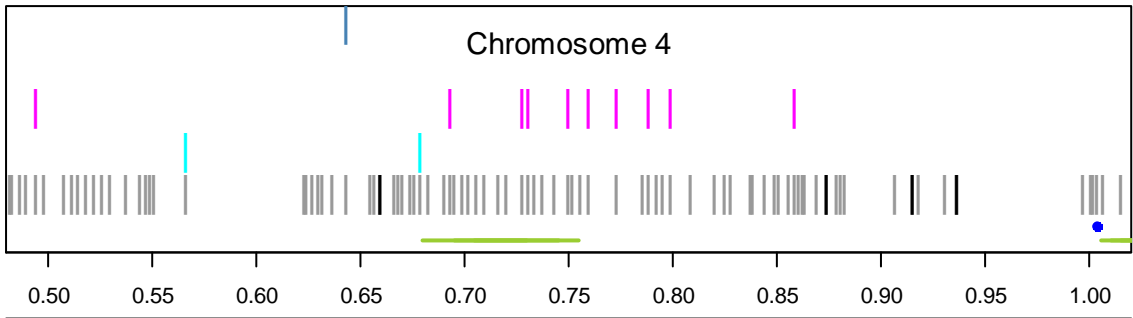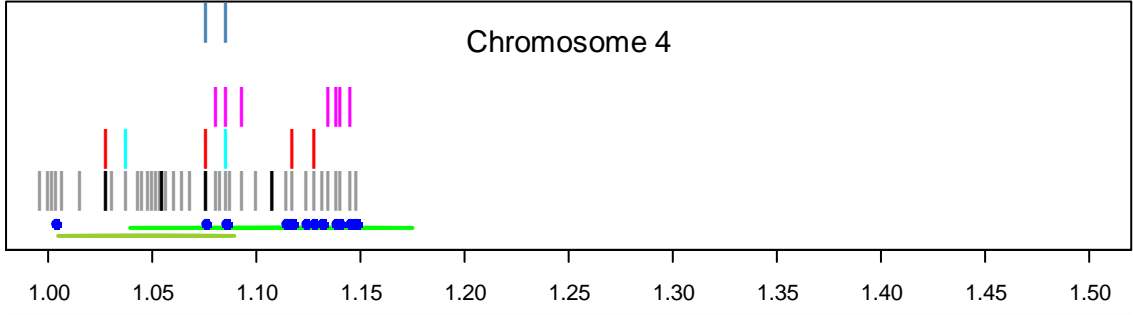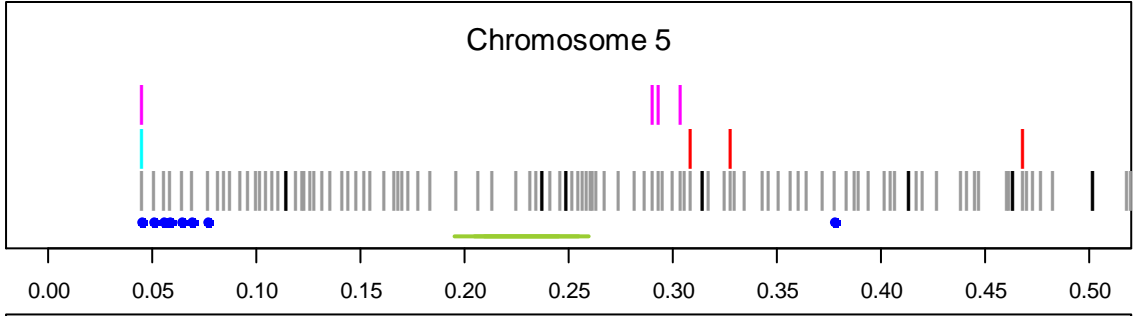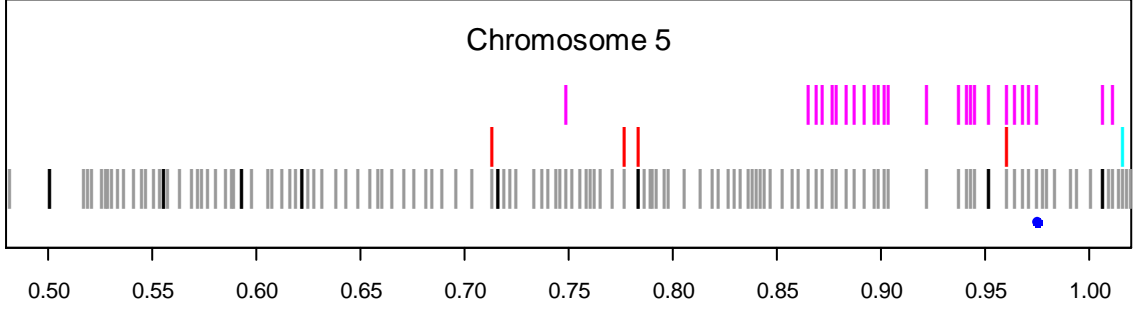

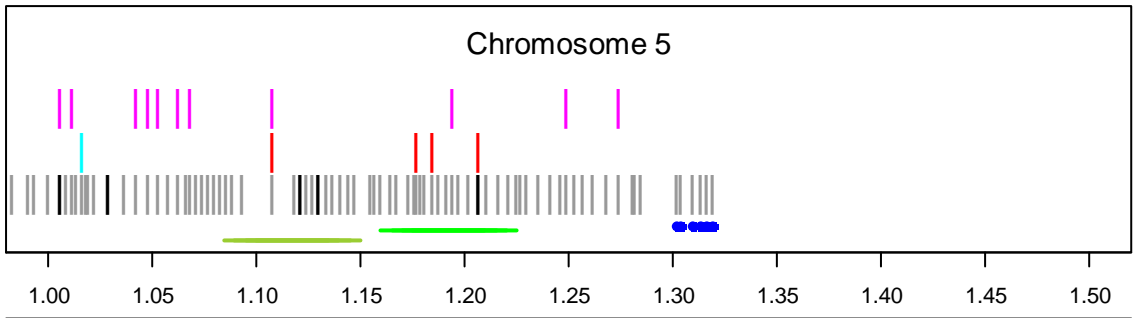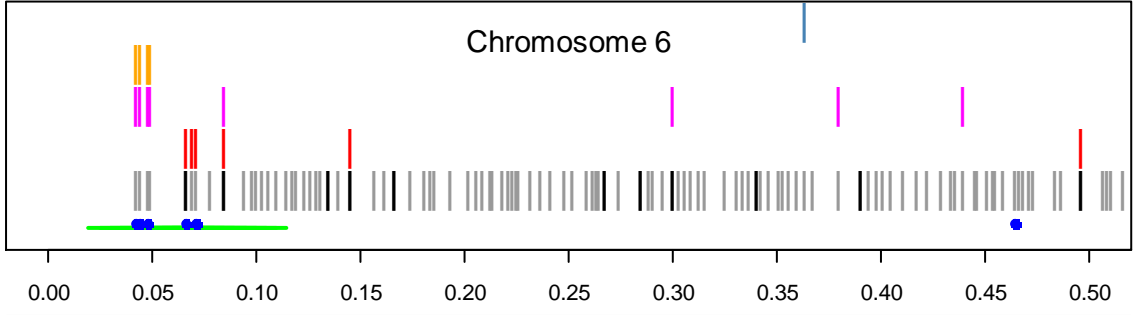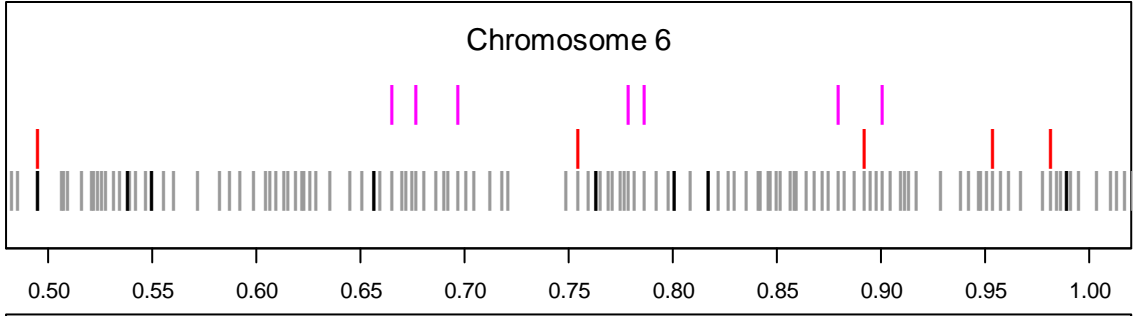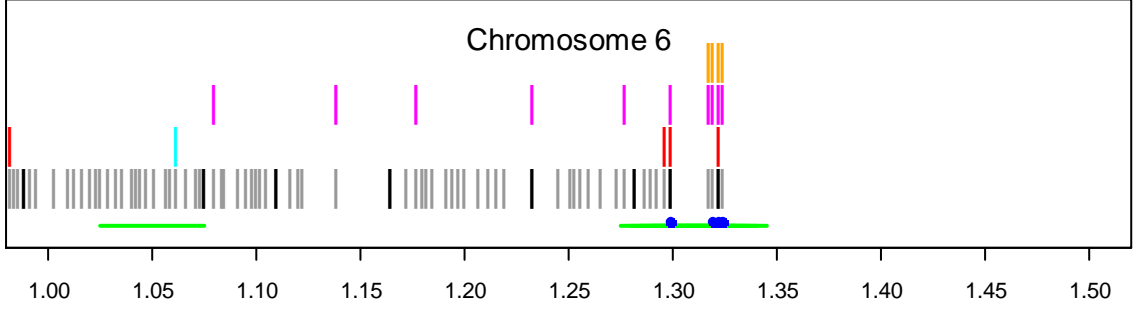

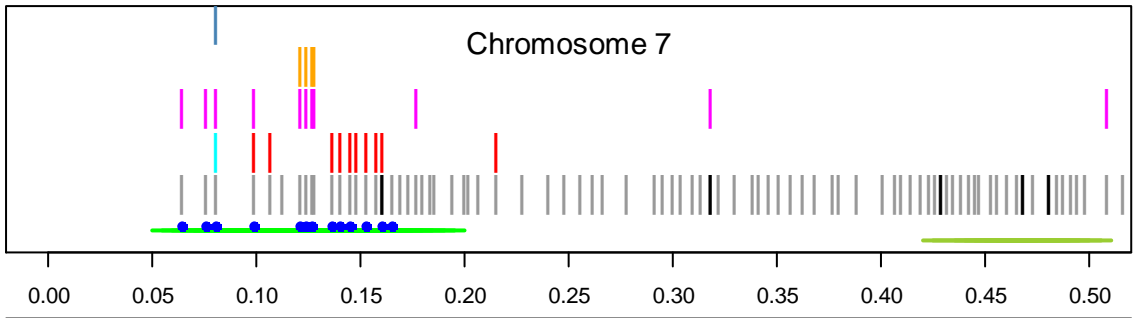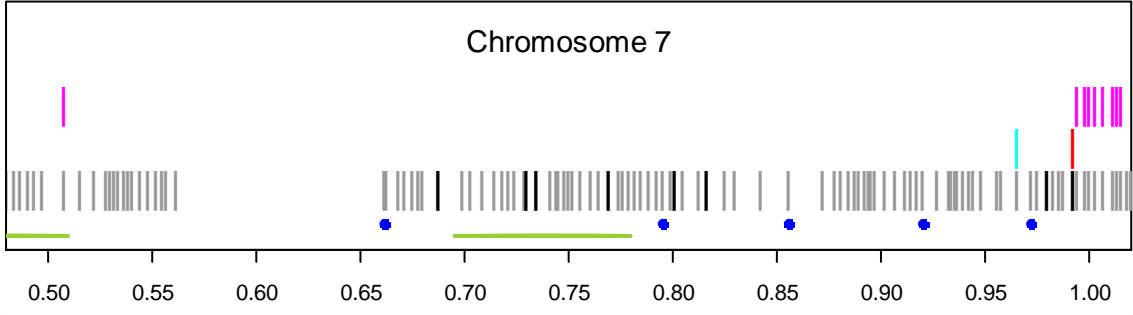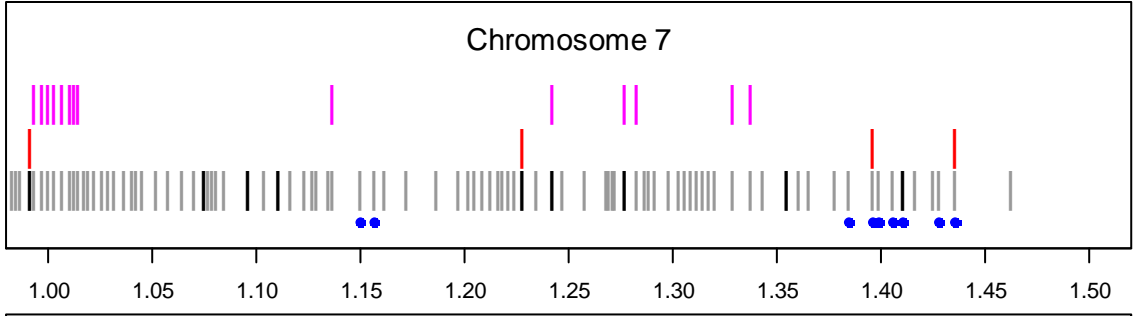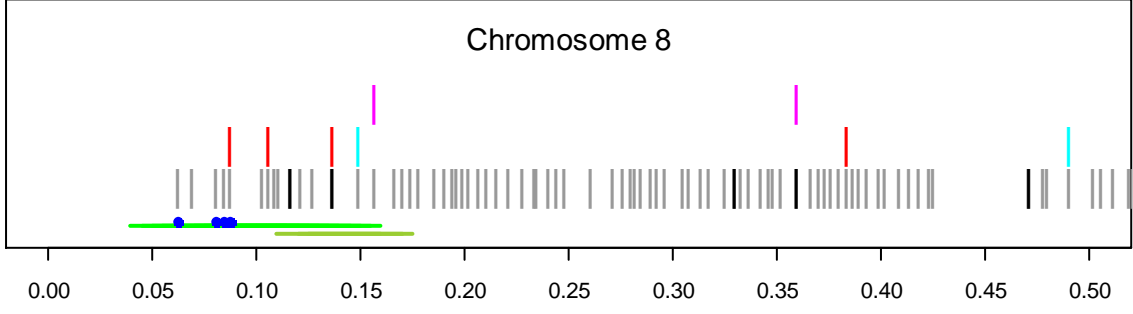

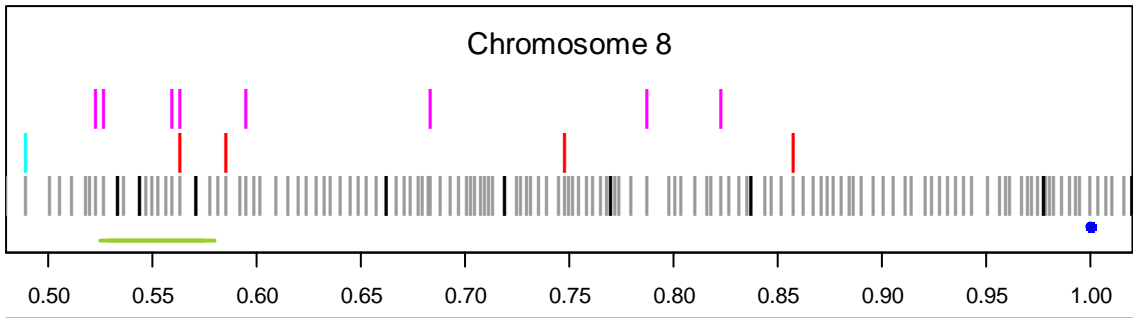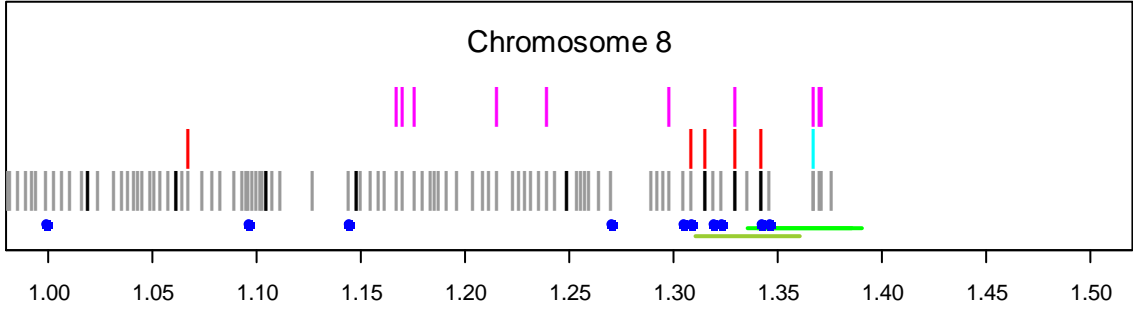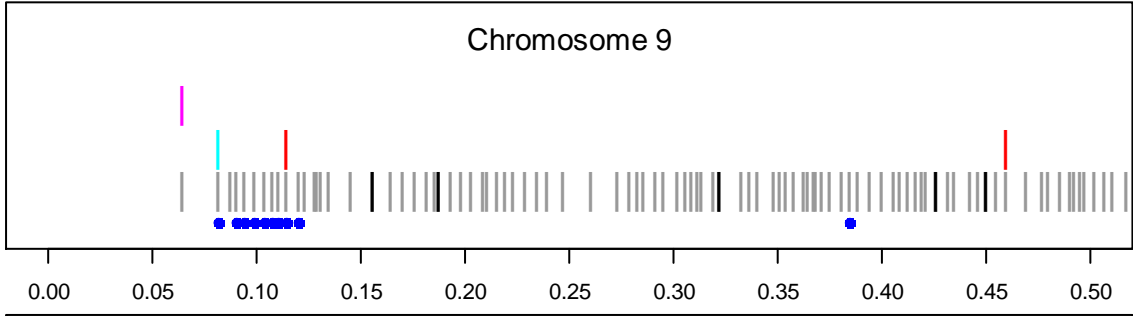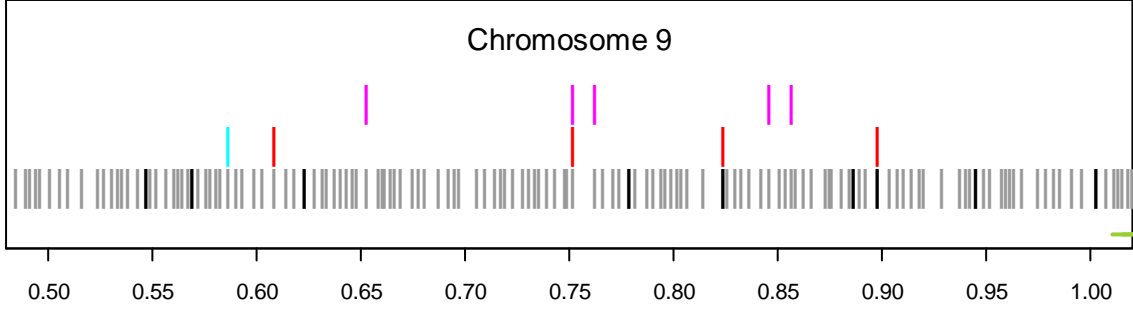

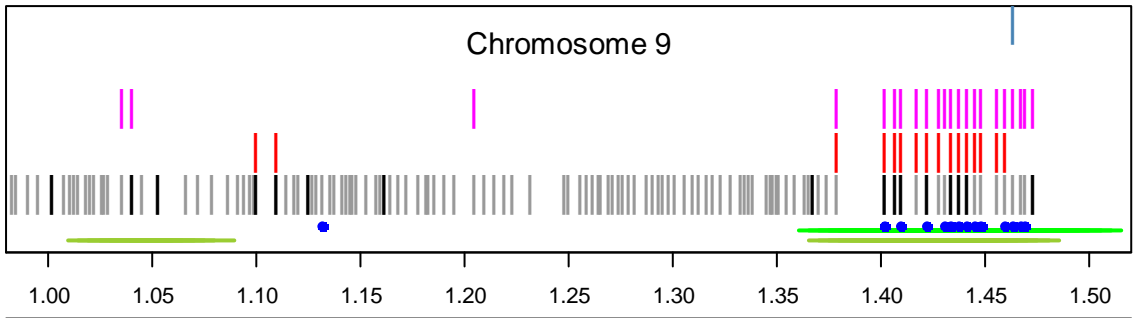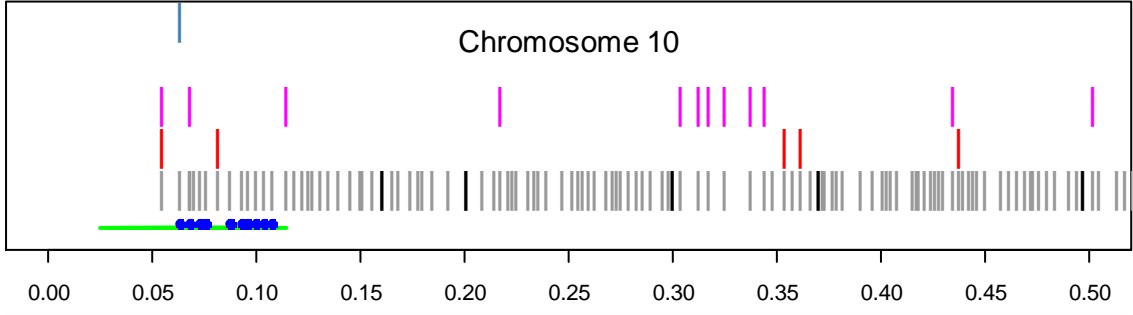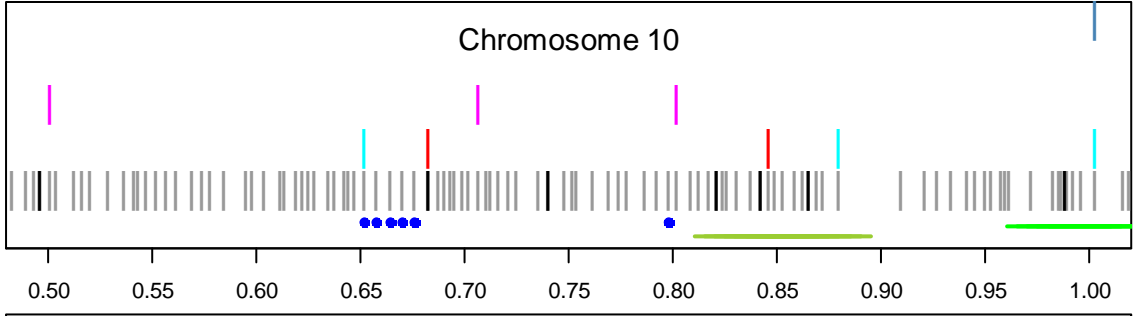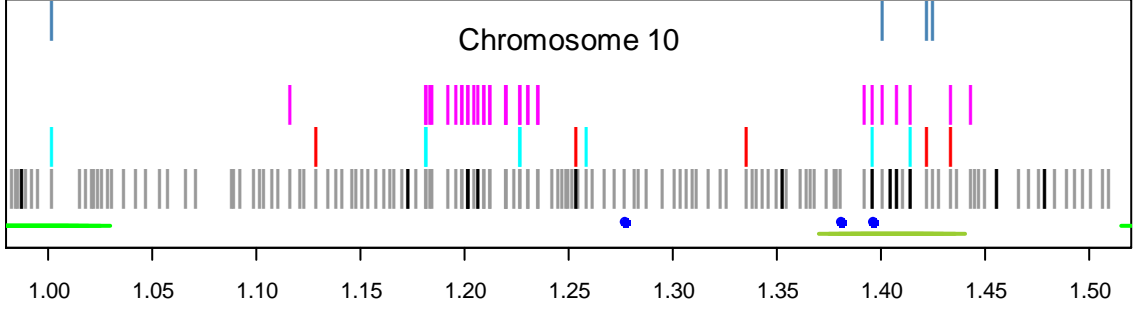

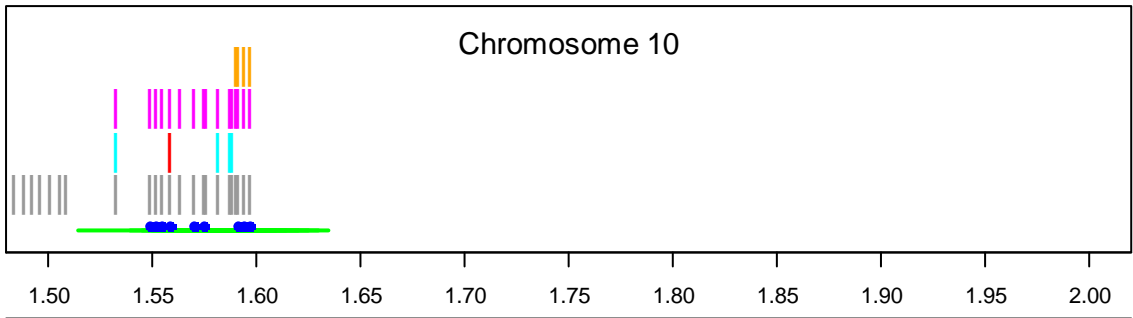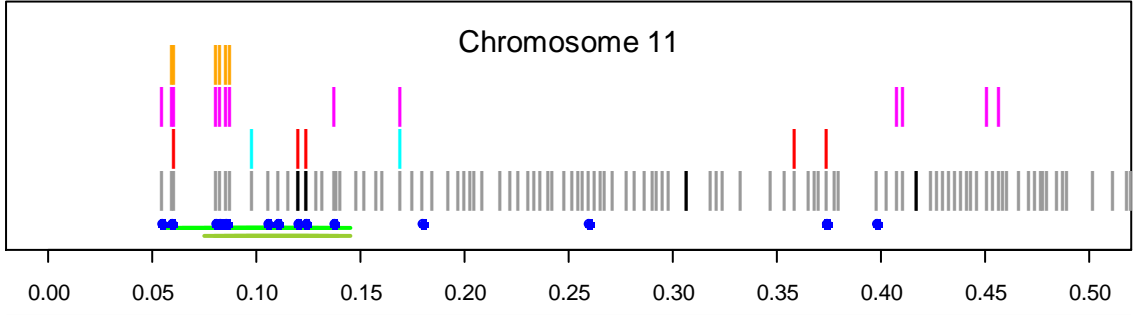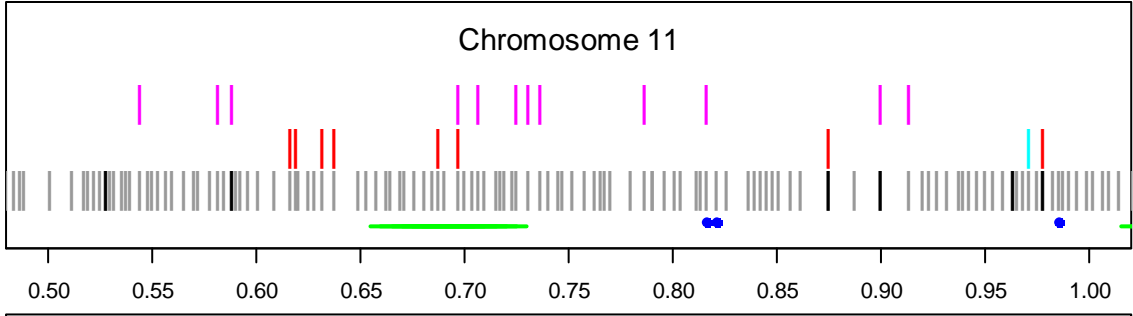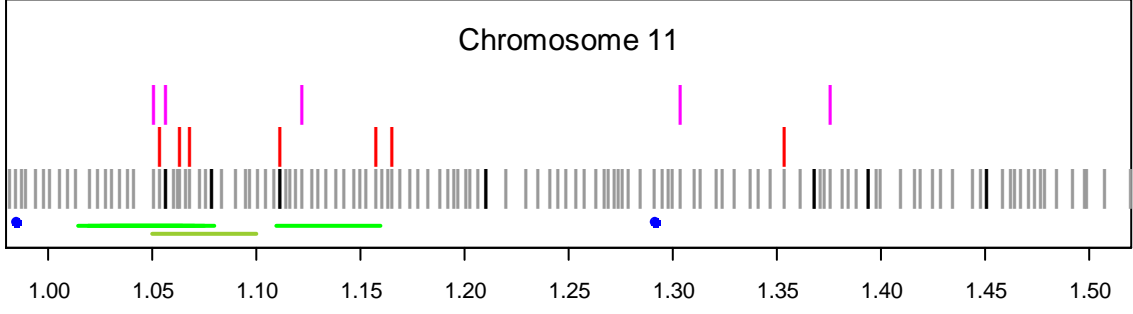



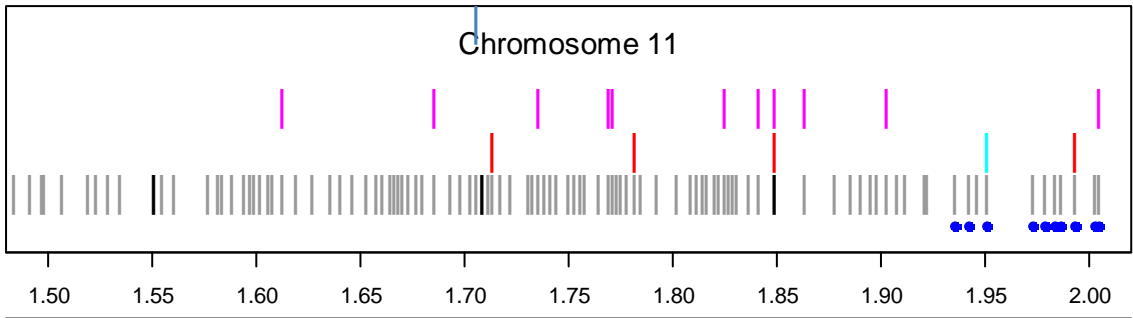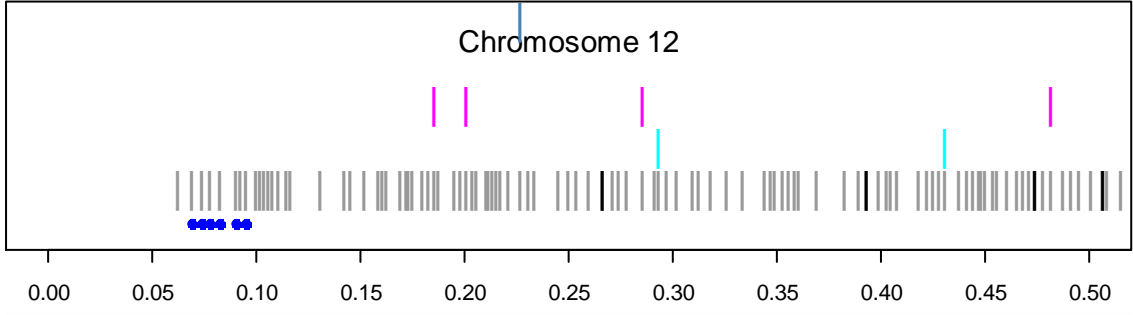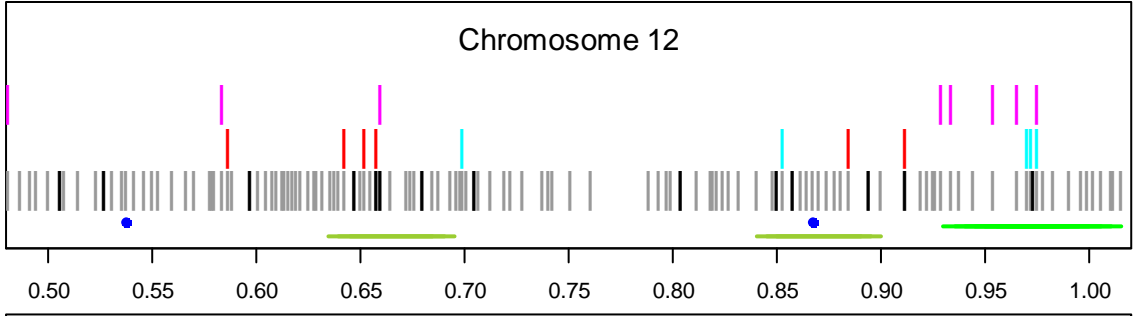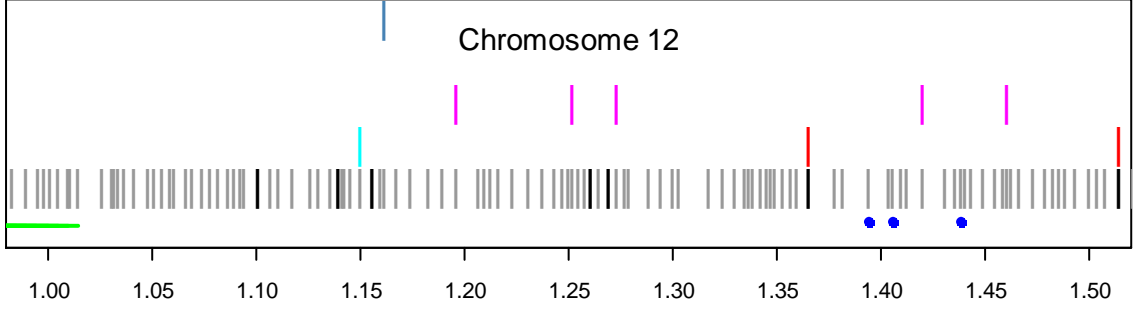

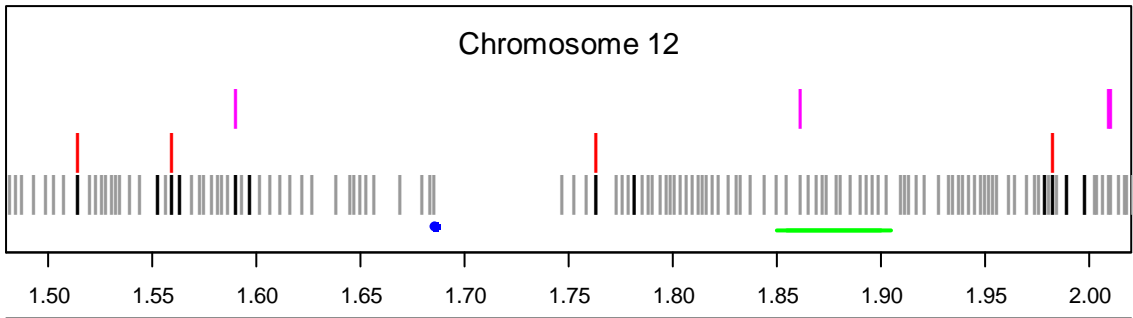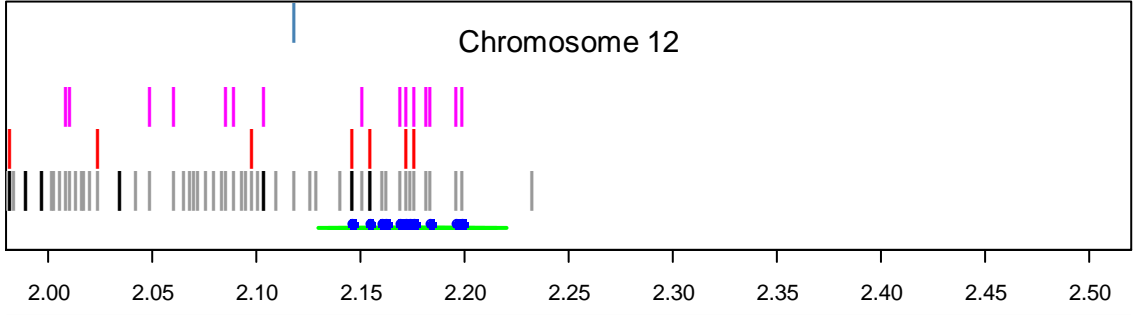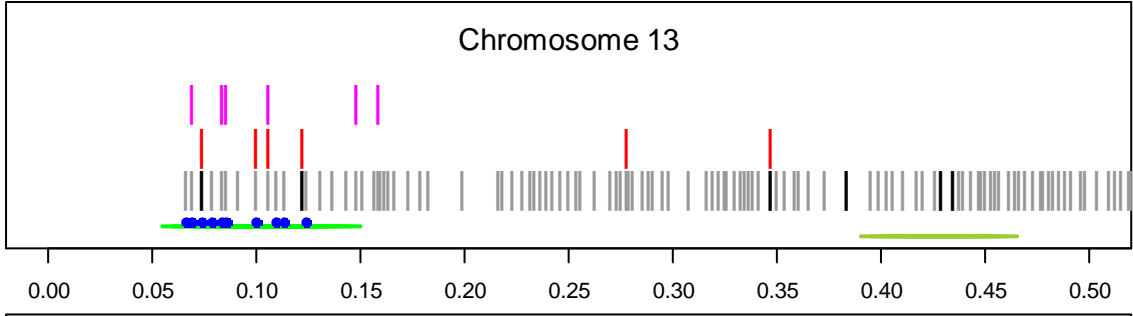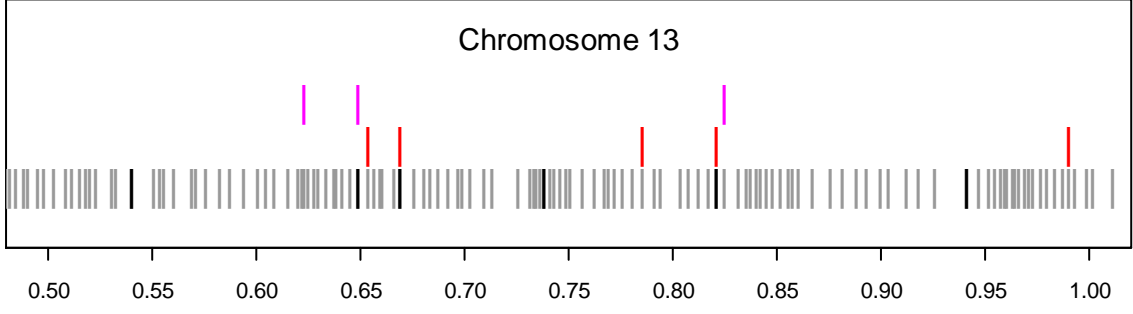

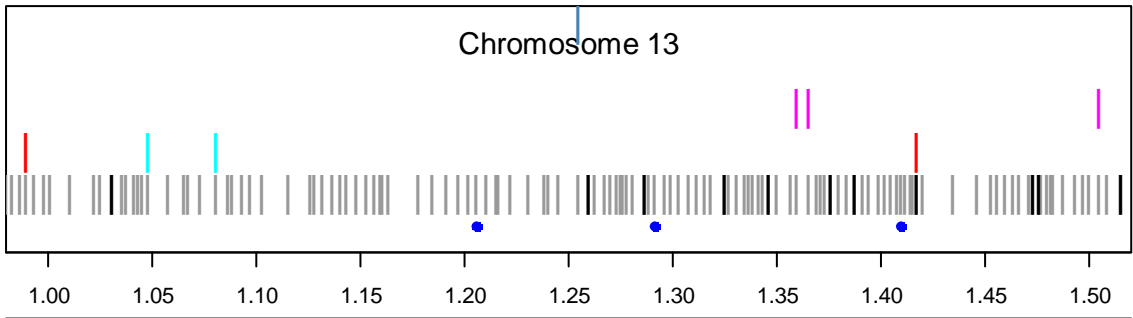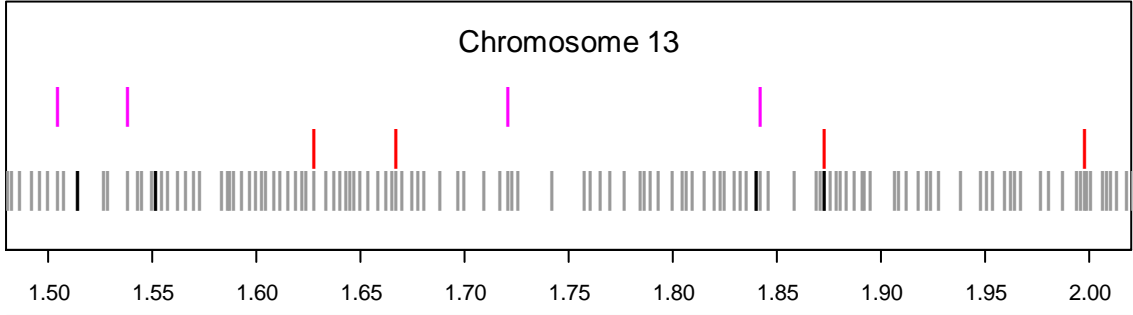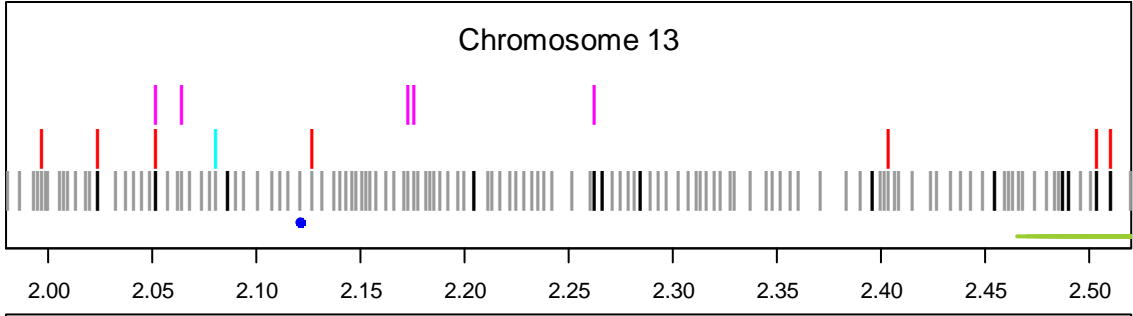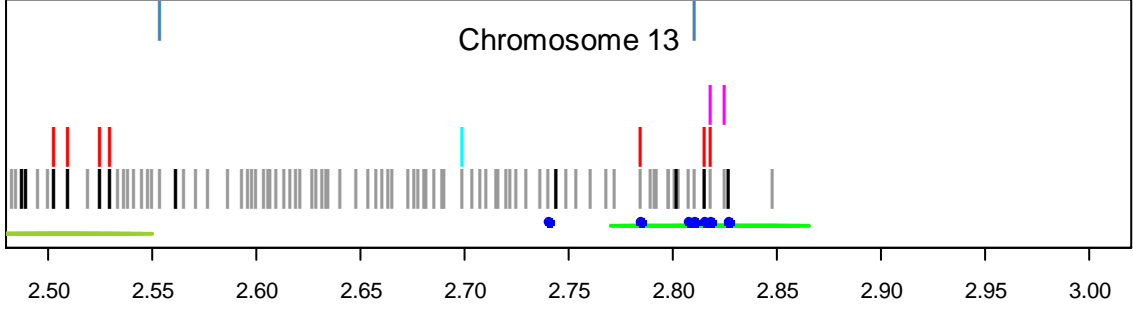

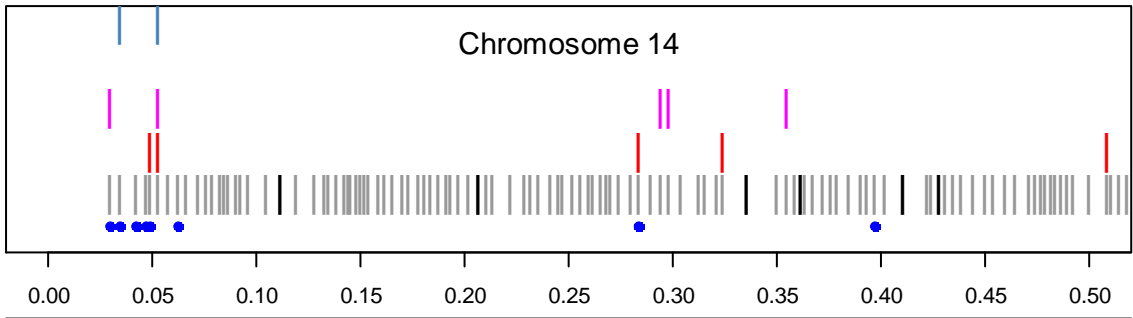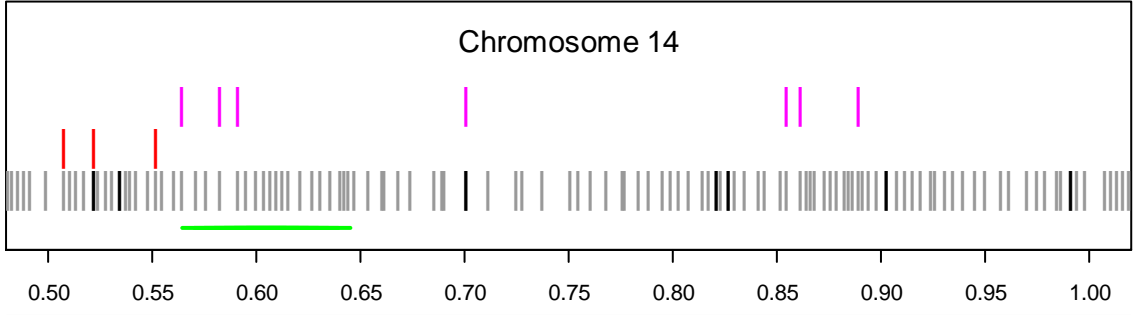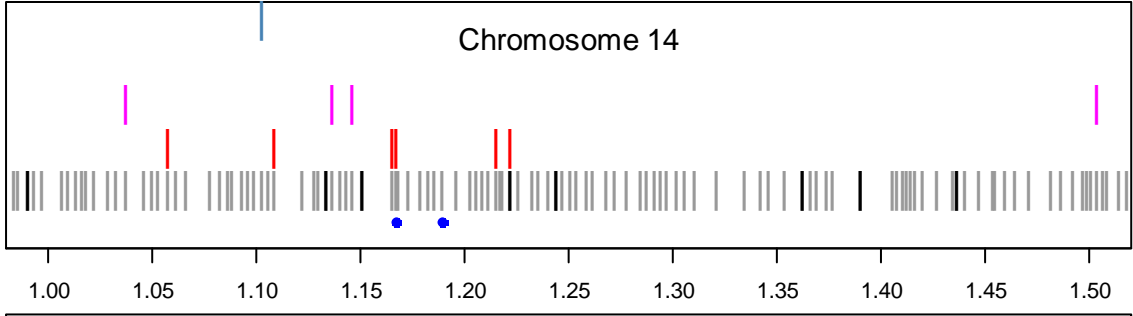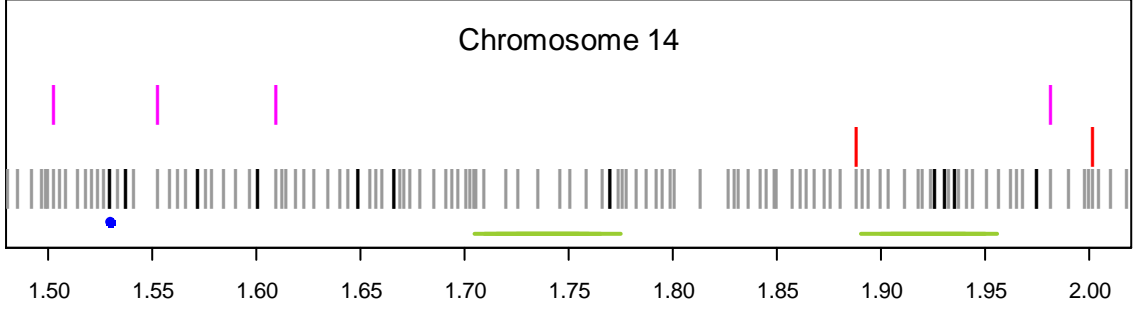

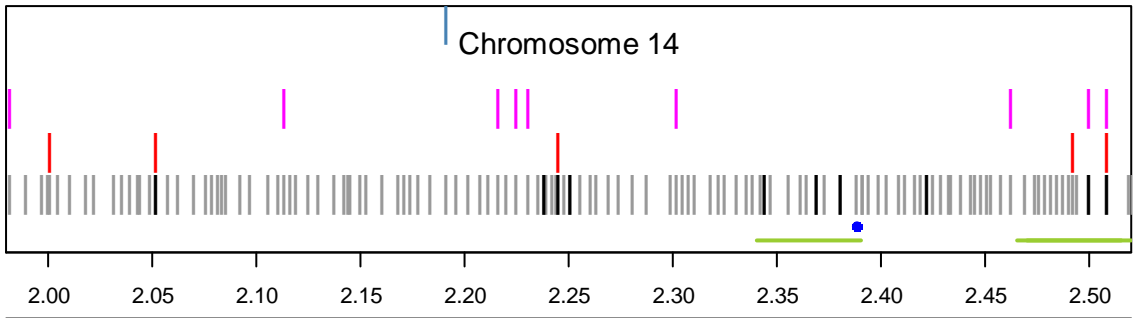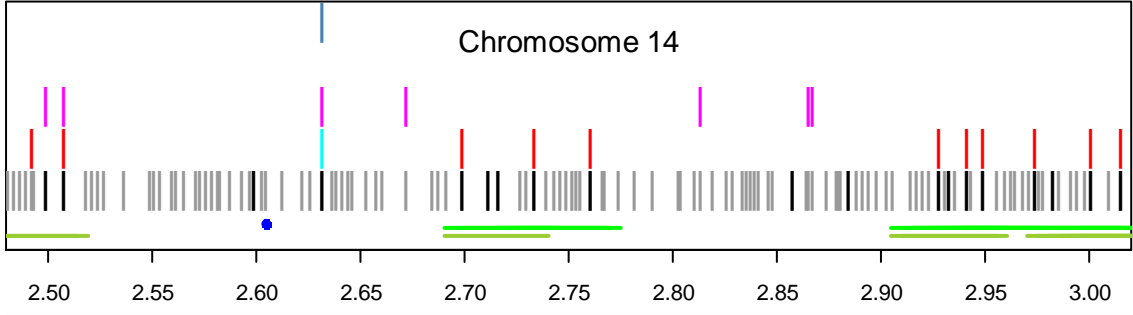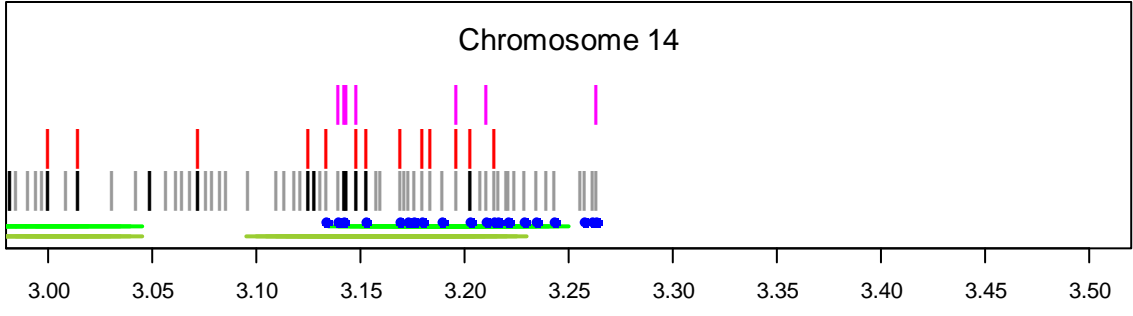

Supplement: ppat.1000644.s010.pdf [file ppat.1000644.s010.pdf]
