# Supplementary material for: Comparative Transcriptional and Genomic Analysis of Plasmodium falciparum Field Isolates
Source: PubMed Central journal article supplement (PMC2764095; doi:10.1371/journal.ppat.1000644), 2009-10-30
Supplement: ppat.1000644.s012.pdf [file ppat.1000644.s012.pdf]

**Table S2.** CNVs and SDs identified in this and other studies.

| <sup>a</sup> Name of CNV | <sup>a</sup> Name of SD | <sup>b</sup> Gene ID | Chromosome | Bp at gene midpoint | <sup>c</sup> Kidgell | <sup>c</sup> Ribacke | <sup>c</sup> Bozdech | <sup>c</sup> Carret | <sup>d</sup> Others         | <sup>e</sup> This study |
|--------------------------|-------------------------|----------------------|------------|---------------------|----------------------|----------------------|----------------------|---------------------|-----------------------------|-------------------------|
| CNV1A                    |                         | PFA0035c             | 1          | 57015               |                      |                      |                      | *                   | Pologe1990                  | 0                       |
| CNV1A                    | SD1L                    | PFA0055c             | 1          | 70094               |                      |                      |                      |                     | Pologe1990                  | 0                       |
| CNV1A                    | SD1L                    | PFA0060w             | 1          | 72258               |                      |                      |                      |                     | Pologe1990                  | 0                       |
| CNV1A                    | SD1L                    | PFA0065w             | 1          | 75198               |                      |                      |                      |                     | Pologe1990                  | 0                       |
| CNV1A                    | SD1L                    | PFA0070c             | 1          | 76629               |                      |                      |                      |                     | Pologe1990                  | 0                       |
| CNV1A                    |                         | PFA0100c             | 1          | 93706               |                      |                      |                      |                     | Pologe1990                  | -2                      |
| CNV1A                    |                         | PFA0110w             | 1          | 100784              |                      | *                    |                      |                     | Pologe1990                  | 0                       |
| CNV1A                    |                         | PFA0115w             | 1          | 105189              |                      |                      |                      |                     |                             | +/-2                    |
| CNV1A                    |                         | PFA0125c             | 1          | 113509              |                      |                      |                      | *                   |                             | 0                       |
| CNV1A                    |                         | PFA0130c             | 1          | 120462              |                      |                      |                      |                     |                             | 2                       |
| CNV1B                    |                         | PFA0170c             | 1          | 150580              |                      |                      |                      |                     |                             | 3                       |
| CNV1C                    |                         | PFA0200w             | 1          | 176228              |                      |                      |                      |                     |                             | -2                      |
| CNV1D                    |                         | PFA0500w             | 1          | 393974              |                      |                      |                      |                     |                             | -3                      |
| CNV1E                    |                         | PFA0650w             | 1          | 516120              |                      | *                    |                      | *                   |                             | -4                      |
| CNV1F                    | SD1R                    | PFA0675w             | 1          | 546452              |                      |                      |                      |                     |                             | 0                       |
| CNV1F                    | SD1R                    | PFA0680c             | 1          | 549711              |                      |                      |                      | *                   |                             | -5                      |
| CNV1F                    | SD1R                    | PFA0685c             | 1          | 552867              |                      |                      |                      |                     |                             | -2                      |
| CNV1F                    | SD1R                    | PFA0690w             | 1          | 554941              |                      |                      |                      |                     |                             | 1                       |
| CNV1F                    |                         | PFA0700c             | 1          | 560177              |                      |                      |                      |                     |                             | 5                       |
| CNV1F                    |                         | PFA0715c             | 1          | 571600              |                      |                      |                      |                     |                             | +/-2                    |
| CNV1F                    |                         | PFA0720w             | 1          | 574056              |                      |                      |                      |                     |                             | 2                       |
| CNV1F                    |                         | PFA0725w             | 1          | 582467              |                      |                      |                      |                     |                             | -2                      |
| CNV2A                    |                         | PFB0056c             | 2          | 60213               |                      |                      |                      | *                   | Pologe1988,<br>Schferf1992A | 2                       |

|       |          |   |        |   |   |   |   |                            |    |
|-------|----------|---|--------|---|---|---|---|----------------------------|----|
| CNV2A | PFB0070w | 2 | 69430  | * | * | * | * | Pologe1988,<br>Scherf1992A | 5  |
| CNV2A | PFB0075c | 2 | 73919  | * | * | * | * | Pologe1988,<br>Scherf1992A | -2 |
| CNV2A | PFB0080c | 2 | 78030  | * | * |   | * | Pologe1988,<br>Scherf1992A | -3 |
| CNV2A | PFB0085c | 2 | 82728  | * | * | * | * | Pologe1988,<br>Scherf1992A | -2 |
| CNV2A | PFB0090c | 2 | 87733  | * | * |   | * | Pologe1988,<br>Scherf1992A | -2 |
| CNV2A | PFB0095c | 2 | 95078  | * | * |   | * | Pologe1988,<br>Scherf1992A | -2 |
| CNV2A | PFB0100c | 2 | 104591 |   | * |   | * | Pologe1988,<br>Scherf1992A | -1 |
| CNV2A | PFB0105c | 2 | 110072 |   |   |   | * |                            | -1 |
| CNV2A | PFB0106c | 2 | 113115 |   |   |   |   |                            | -1 |
| CNV2B | PFB0210c | 2 | 206646 |   |   |   |   |                            | -1 |
| CNV2C | PFB0285c | 2 | 265192 |   |   |   |   |                            | +3 |
| CNV2D | PFB0300c | 2 | 274098 |   |   |   |   |                            | -3 |
| CNV2D | PFB0310c | 2 | 277975 |   |   |   |   |                            | 2  |
| CNV2E | PFB0330c | 2 | 295945 |   |   |   |   |                            | -5 |
| CNV2F | PFB0365w | 2 | 331568 |   |   |   |   |                            | -2 |
| CNV2G | PFB0405w | 2 | 375142 |   |   |   |   |                            | -3 |
| CNV2H | PFB0570w | 2 | 523465 |   |   |   |   |                            | -2 |
| CNV2I | PFB0710c | 2 | 643712 |   |   |   |   |                            | 5  |
| CNV2J | PFB0865w | 2 | 753202 |   |   |   |   |                            | 3  |
| CNV2K | PFB0950w | 2 | 848302 |   |   |   |   |                            | -2 |
| CNV2L | PFB0960c | 2 | 863612 |   |   |   | * | *                          | 0  |
| CNV2M | PFB0965c | 2 | 866119 | * |   |   | * |                            | 0  |
| CNV2M | PFB0970c | 2 | 870314 | * |   |   |   |                            | 0  |
| CNV2M | PFB0972w | 2 | 873223 |   | * |   | * |                            | 0  |

|       |      |          |   |         |   |   |   |           |
|-------|------|----------|---|---------|---|---|---|-----------|
| CNV2M |      | PFB0973c | 2 | 874012  | * | * |   | 0         |
| CNV2N | SD2R | PFB0980w | 2 | 877406  |   |   |   | 0         |
| CNV2N | SD2R | PFB0985c | 2 | 878858  |   | * | * | 0         |
| CNV2N | SD2R | PFB0990c | 2 | 881866  |   |   |   | 0         |
| CNV2N | SD2R | PFB0995w | 2 | 883924  |   |   |   | 0         |
| CNV3A |      | PFC0050c | 3 | 67366   |   | * |   | 0         |
| CNV3B |      | PFC0110w | 3 | 118777  |   |   | * | Iriko2008 |
| CNV3B |      | PFC0120w | 3 | 134718  |   |   |   | Iriko2008 |
| CNV3C |      | PFC0205c | 3 | 216169  |   |   |   | -4        |
| CNV3D |      | PFC0245c | 3 | 264061  |   |   |   | 2         |
| CNV3E |      | PFC0270w | 3 | 290421  |   |   |   | 4         |
| CNV3E |      | PFC0271c | 3 | 292276  |   |   |   | 2         |
| CNV3F |      | PFC0345w | 3 | 355562  |   |   |   | 3         |
| CNV3G |      | PFC0390w | 3 | 395757  |   |   |   | -3        |
| CNV3H |      | PFC0460w | 3 | 466379  |   |   |   | -3        |
| CNV3I |      | PFC0475c | 3 | 478464  |   |   |   | 6         |
| CNV3J |      | PFC0520w | 3 | 519101  |   |   |   | -3        |
| CNV3K |      | PFC0582c | 3 | 566721  |   |   |   | 1         |
| CNV3L |      | PFC0595c | 3 | 576678  |   |   |   | -5        |
| CNV3M |      | PFC0695w | 3 | 641401  |   |   |   | -2        |
| CNV3N |      | PFC0865w | 3 | 812882  |   |   |   | 3         |
| CNV3N |      | PFC0870w | 3 | 814974  | * |   |   | 2         |
| CNV3N |      | PFC0875w | 3 | 822425  | * |   |   | 0         |
| CNV3O |      | PFC0925w | 3 | 875293  |   |   |   | 5         |
| CNV3P |      | PFC1016w | 3 | 961324  |   |   |   | 2         |
| CNV3Q |      | PFC1060c | 3 | 989255  |   |   |   | 4         |
| CNV3R | SD3R | PFC1075w | 3 | 1003046 |   |   |   | 0         |
| CNV3R | SD3R | PFC1080c | 3 | 1004478 |   |   |   | -1        |
| CNV3R | SD3R | PFC1085c | 3 | 1007411 |   |   |   | 0         |
| CNV3R | SD3R | PFC1090w | 3 | 1009580 |   |   |   | 0         |

|       |          |   |         |   |              |      |
|-------|----------|---|---------|---|--------------|------|
| CNV4A | PFD0100c | 4 | 137547  | * |              | 0    |
| CNV4A | PFD0110w | 4 | 148605  | * |              | 0    |
| CNV4B | PFD0150w | 4 | 185818  |   |              | 7    |
| CNV4C | PFD0403w | 4 | 409295  |   |              | 7    |
| CNV4D | PFD0735c | 4 | 682802  |   |              | 3    |
| CNV4E | PFD0745c | 4 | 693710  |   |              | 3    |
| CNV4F | PFD0765w | 4 | 702203  |   |              | -2   |
| CNV4G | PFD0795w | 4 | 727421  |   |              | 5    |
| CNV4H | PFD0820w | 4 | 749601  |   |              | -3   |
| CNV4I | PFD0835c | 4 | 759267  |   |              | 7    |
| CNV4J | PFD1150c | 4 | 1093068 |   |              | 3    |
| CNV4K | PFD1200c | 4 | 1138422 |   |              | -5   |
| CNV4K | PFD1205w | 4 | 1140613 | * | *            | -2   |
| CNV4K | PFD1210w | 4 | 1145464 | * |              | 0    |
| CNV5A | PFE0040c | 5 | 45544   |   | Petersen1989 | 3    |
| CNV5B | PFE0060w | 5 | 64777   |   |              | 2    |
| CNV5C | PFE0070w | 5 | 77176   |   |              | -2   |
| CNV5D | PFE0290c | 5 | 254890  |   |              | -3   |
| CNV5E | PFE0335w | 5 | 286357  |   |              | 4    |
| CNV5F | PFE0360c | 5 | 303271  | * |              | 0    |
| CNV5G | PFE0435c | 5 | 364015  |   |              | 2    |
| CNV5H | PFE0510c | 5 | 441327  |   |              | 3    |
| CNV5I | PFE0740c | 5 | 616636  |   |              | -2   |
| CNV5J | PFE0825w | 5 | 684782  |   |              | -3   |
| CNV5K | PFE0935c | 5 | 777255  |   |              | +/-2 |
| CNV5L | PFE1035c | 5 | 844079  |   |              | 2    |
| CNV5M | PFE1060c | 5 | 864754  |   |              | -2   |
| CNV5M | PFE1065w | 5 | 869393  | * |              | 0    |
| CNV5M | PFE1070c | 5 | 872374  | * |              | 0    |
| CNV5M | PFE1075c | 5 | 876714  | * |              | 0    |

|       |          |   |         |   |    |
|-------|----------|---|---------|---|----|
| CNV5M | PFE1080w | 5 | 878912  | * | 0  |
| CNV5M | PFE1085w | 5 | 883636  | * | 0  |
| CNV5M | PFE1090w | 5 | 886970  | * | 0  |
| CNV5M | PFE1095w | 5 | 891689  | * | 0  |
| CNV5M | PFE1100w | 5 | 896474  | * | 0  |
| CNV5M | PFE1105c | 5 | 898606  | * | 0  |
| CNV5M | PFE1110w | 5 | 901789  | * | 0  |
| CNV5M | PFE1115c | 5 | 903724  | * | 0  |
| CNV5M | PFE1120w | 5 | 922071  | * | 0  |
| CNV5M | PFE1125w | 5 | 937671  | * | 0  |
| CNV5M | PFE1130w | 5 | 940970  | * | 0  |
| CNV5M | PFE1135w | 5 | 943315  | * | 0  |
| CNV5M | PFE1140c | 5 | 944553  | * | 2  |
| CNV5M | PFE1145w | 5 | 951275  | * | 0  |
| CNV5M | PFE1150w | 5 | 960015  | * | 0  |
| CNV5M | PFE1155c | 5 | 964131  | * | 0  |
| CNV5M | PFE1160w | 5 | 967925  | * | 0  |
| CNV5M | PFE1165c | 5 | 970609  | * | 0  |
| CNV5M | PFE1170w | 5 | 974586  | * | 0  |
| CNV5N | PFE1200w | 5 | 1006168 |   | 0  |
| CNV5N | PFE1210c | 5 | 1011556 |   | 0  |
| CNV5O | PFE1250w | 5 | 1042752 |   | 0  |
| CNV5O | PFE1255w | 5 | 1048354 |   | 3  |
| CNV5O | PFE1260c | 5 | 1053187 |   | 4  |
| CNV5P | PFE1280w | 5 | 1068897 |   | -3 |
| CNV5Q | PFE1300w | 5 | 1080389 |   | -1 |
| CNV5Q | PFE1325w | 5 | 1107985 |   | 7  |
| CNV5R | PFE1425c | 5 | 1177121 |   | 1  |
| CNV5S | PFE1440c | 5 | 1184704 |   | 2  |
| CNV5T | PFE1455w | 5 | 1194146 |   | +3 |

|       |      |            |   |         |            |      |
|-------|------|------------|---|---------|------------|------|
| CNV5U |      | PFE1490c   | 5 | 1221378 |            | -1   |
| CNV5V |      | PFE1505w   | 5 | 1227313 |            | 2    |
| CNV5W |      | PFE1530c   | 5 | 1249158 |            | +/-2 |
| CNV6A | SD6L | PFF0050c   | 6 | 42658   |            | 0    |
| CNV6A | SD6L | PFF0055w   | 6 | 44830   |            | 0    |
| CNV6A | SD6L | PFF0060w   | 6 | 47859   |            | -2   |
| CNV6A | SD6L | PFF0065c   | 6 | 49295   |            | 0    |
| CNV6B |      | PFF0090w   | 6 | 78484   |            | -1   |
| CNV6C |      | PFF0580w   | 6 | 506784  |            | -2   |
| CNV6D |      | PFF0790c   | 6 | 677227  |            | 2    |
| CNV6E |      | PFF0870w   | 6 | 759800  |            | -2   |
| CNV6F |      | PFF0880c   | 6 | 765077  |            | 1    |
| CNV6G |      | PFF0905w   | 6 | 779161  |            | 5    |
| CNV6H |      | PFF0950w   | 6 | 826462  |            | 2    |
| CNV6I |      | PFF1175c   | 6 | 991288  |            | 3    |
| CNV6J |      | PFF1300w   | 6 | 1080159 |            | -4   |
| CNV6K |      | PFF1325c   | 6 | 1097976 |            | 1    |
| CNV6K |      | PFF1330c   | 6 | 1100569 |            | 2    |
| CNV6K |      | PFF1335c   | 6 | 1102294 |            | 4    |
| CNV6L |      | PFF1350c   | 6 | 1116042 |            | -4   |
| CNV6M |      | PFF1377w   | 6 | 1177426 | *          | -2   |
| CNV6O | SD6R | PFF1520w   | 6 | 1317300 |            | 0    |
| CNV6O | SD6R | PFF1525c   | 6 | 1318725 |            | 0    |
| CNV6O | SD6R | PFF1530c   | 6 | 1321710 |            | 1    |
| CNV6O | SD6R | PFF1535w   | 6 | 1323868 |            | 0    |
| CNV7A |      | MAL7P1.220 | 7 | 64957   | Pologe1988 | -6   |
| CNV7A |      | MAL7P1.224 | 7 | 76518   | Pologe1988 | -2   |
| CNV7A |      | MAL7P1.225 | 7 | 81315   | Pologe1988 | -2   |
| CNV7A |      | MAL7P1.231 | 7 | 99203   |            | -6   |
| CNV7B | SD7L | MAL7P1.3   | 7 | 121670  |            | 0    |

|       |      |            |   |         |   |      |
|-------|------|------------|---|---------|---|------|
| CNV7B | SD7L | MAL7P1.4   | 7 | 123832  |   | 0    |
| CNV7B | SD7L | MAL7P1.5   | 7 | 126831  |   | -5   |
| CNV7B | SD7L | PF07_0002  | 7 | 128277  |   | 0    |
| CNV7C |      | MAL7P1.340 | 7 | 345999  |   | +/-2 |
| CNV7D |      | MAL7P1.30  | 7 | 508384  |   | 4    |
| CNV7E |      | PF07_0042  | 7 | 522849  |   | 2    |
| CNV7F |      | PF07_0070  | 7 | 792230  |   | -2   |
| CNV7G |      | MAL7P1.117 | 7 | 993963  | * | 1    |
| CNV7G |      | PF07_0090  | 7 | 997521  | * | 0    |
| CNV7G |      | MAL7P1.118 | 7 | 1000005 | * | 0    |
| CNV7G |      | MAL7P1.119 | 7 | 1002864 | * | 0    |
| CNV7G |      | MAL7P1.120 | 7 | 1006658 | * | 0    |
| CNV7G |      | MAL7P1.122 | 7 | 1010940 | * | 0    |
| CNV7G |      | PF07_0091  | 7 | 1012845 | * | 0    |
| CNV7G |      | PF07_0092  | 7 | 1015166 | * | 0    |
| CNV7H |      | MAL7P1.123 | 7 | 1022099 |   | +/-2 |
| CNV7I |      | MAL7P1.142 | 7 | 1136869 |   | 3    |
| CNV7J |      | PF07_0112  | 7 | 1218647 |   | -3   |
| CNV7K |      | PF07_0116  | 7 | 1242663 |   | 2    |
| CNV7L |      | MAL7P1.155 | 7 | 1277326 |   | 4    |
| CNV7M |      | MAL7P1.163 | 7 | 1337430 |   | -3   |
| CNV8A |      | MAL8P1.160 | 8 | 84495   |   | 2    |
| CNV8B |      | PF08_0136b | 8 | 103514  |   | -2   |
| CNV8C |      | PF08_0122  | 8 | 275533  |   | 5    |
| CNV8D |      | PF08_0119  | 8 | 292159  |   | -4   |
| CNV8E |      | PF08_0114  | 8 | 359555  |   | 2    |
| CNV8F |      | PF08_0098  | 8 | 523719  |   | 4    |
| CNV8G |      | PF08_0078  | 8 | 674408  |   | 3    |
| CNV8H |      | MAL8P1.77  | 8 | 768652  |   | 2    |
| CNV8I |      | MAL8P1.71  | 8 | 823019  |   | 4    |

|       |            |   |         |   |             |    |
|-------|------------|---|---------|---|-------------|----|
| CNV8J | PF08_0022  | 8 | 1144475 |   |             | 5  |
| CNV8K | MAL8P1.22  | 8 | 1149992 |   |             | 2  |
| CNV8L | MAL8P1.20  | 8 | 1167002 |   |             | 3  |
| CNV8M | PF08_0008  | 8 | 1239465 |   |             | 5  |
| CNV8N | MAL8P1.11  | 8 | 1249269 |   |             | 2  |
| CNV8N | MAL8P1.10  | 8 | 1254144 |   |             | 3  |
| CNV8O | PF08_0003  | 8 | 1298302 |   |             | 5  |
| CNV8P | MAL8P1.1   | 8 | 1329237 |   |             | -8 |
| CNV8Q | MAL8P1.211 | 8 | 1367346 |   |             | -2 |
| CNV8R | MAL8P1.213 | 8 | 1370838 |   |             | -5 |
| CNV9A | PFI0060c   | 9 | 64322   |   |             | -3 |
| CNV9A | PFI0085c   | 9 | 82298   |   |             | -3 |
| CNV9B | PFI0360c   | 9 | 357167  |   |             | 2  |
| CNV9C | PFI0415c   | 9 | 399956  |   |             | 3  |
| CNV9D | PFI0525w   | 9 | 494826  |   |             | -3 |
| CNV9E | PFI0545w   | 9 | 510222  |   |             | -2 |
| CNV9F | PFI0565w   | 9 | 530723  |   |             | 3  |
| CNV9G | PFI0785c   | 9 | 669481  |   |             | 3  |
| CNV9H | PFI0895c   | 9 | 751880  |   |             | -4 |
| CNV9I | PFI0905w   | 9 | 762011  |   |             | 2  |
| CNV9J | PFI0945w   | 9 | 793682  |   |             | -4 |
| CNV9K | PFI1030c   | 9 | 858198  |   |             | 2  |
| CNV9L | PFI1080w   | 9 | 891652  |   |             | -3 |
| CNV9M | PFI1265w   | 9 | 1035937 | * |             | -2 |
| CNV9M | PFI1270w   | 9 | 1041105 | * |             | 0  |
| CNV9N | PFI1380c   | 9 | 1137565 |   |             | 4  |
| CNV9O | PFI1475w   | 9 | 1204383 | * | *           | 2  |
| CNV9P | PFI1520w   | 9 | 1261476 |   |             | -1 |
| CNV9P | PFI1525w   | 9 | 1263949 |   |             | 2  |
| CNV9Q | PFI1710w   | 9 | 1378842 | * | * Spielmann | -2 |



|        |           |    |         |   |   |           |    |
|--------|-----------|----|---------|---|---|-----------|----|
| CNV9Q  | PFI1715w  | 9  | 1401341 |   | * | Spielmann | -5 |
| CNV9Q  | PFI1720w  | 9  | 1406096 |   | * | Spielmann | -4 |
| CNV9Q  | PFI1725w  | 9  | 1409593 |   | * | Spielmann | -5 |
| CNV9Q  | PFI1730w  | 9  | 1416786 |   | * | Spielmann | -6 |
| CNV9Q  | PFI1735c  | 9  | 1421634 |   | * | Spielmann | -5 |
| CNV9Q  | PFI1740c  | 9  | 1427737 |   | * | Spielmann | -5 |
| CNV9Q  | PFI1745c  | 9  | 1430866 |   | * | Spielmann | 0  |
| CNV9Q  | PFI1750c  | 9  | 1433709 |   | * | Spielmann | -5 |
| CNV9Q  | PFI1755c  | 9  | 1437323 |   | * | Spielmann | -5 |
| CNV9Q  | PFI1760w  | 9  | 1441211 |   | * | Spielmann | -5 |
| CNV9Q  | PFI1765c  | 9  | 1444546 |   | * | Spielmann | -4 |
| CNV9Q  | PFI1770w  | 9  | 1447426 |   | * | Spielmann | 0  |
| CNV9Q  | PFI1775w  | 9  | 1455059 |   | * | Spielmann | -5 |
| CNV9Q  | PFI1780w  | 9  | 1459115 | * | * | Spielmann | -5 |
| CNV9Q  | PFI1785w  | 9  | 1463018 | * | * |           | -5 |
| CNV9Q  | PFI1790w  | 9  | 1466573 | * | * |           | -1 |
| CNV9Q  | PFI1795c  | 9  | 1468970 | * | * |           | -3 |
| CNV9Q  | PFI1800w  | 9  | 1472376 | * | * |           | -5 |
| CNV10A | PF10_0007 | 10 | 54657   |   | * |           | 0  |
| CNV10A | PF10_0013 | 10 | 63593   |   | * |           | 0  |
| CNV10A | PF10_0014 | 10 | 68099   |   | * |           | 0  |
| CNV10A | PF10_0016 | 10 | 70684   |   |   |           | -1 |
| CNV10B | PF10_0023 | 10 | 99871   |   |   |           | -1 |
| CNV10C | PF10_0067 | 10 | 274513  |   |   |           | 2  |
| CNV10D | PF10_0075 | 10 | 303523  | * |   |           | 0  |
| CNV10D | PF10_0076 | 10 | 312640  | * |   |           | 0  |
| CNV10D | PF10_0077 | 10 | 317465  | * |   |           | 0  |
| CNV10D | PF10_0078 | 10 | 324581  | * |   |           | 0  |
| CNV10D | PF10_0079 | 10 | 337027  | * |   |           | 0  |
| CNV10D | PF10_0080 | 10 | 344316  | * |   |           | 0  |

|        |           |    |         |    |
|--------|-----------|----|---------|----|
| CNV10E | PF10_0121 | 10 | 475944  | -3 |
| CNV10F | PF10_0134 | 10 | 541157  | 2  |
| CNV10G | PF10_0136 | 10 | 547290  | 5  |
| CNV10H | PF10_0190 | 10 | 801889  | 3  |
| CNV10I | PF10_0217 | 10 | 941084  | 2  |
| CNV10J | PF10_0252 | 10 | 1088314 | 5  |
| CNV10K | PF10_0262 | 10 | 1116032 | 4  |
| CNV10K | PF10_0263 | 10 | 1121734 | -1 |
| CNV10L | PF10_0268 | 10 | 1141594 | 4  |
| CNV10M | PF10_0281 | 10 | 1181751 | -5 |
| CNV10M | PF10_0282 | 10 | 1183865 | -7 |
| CNV10M | PF10_0283 | 10 | 1185021 | -8 |
| CNV10M | PF10_0284 | 10 | 1192719 | -6 |
| CNV10M | PF10_0285 | 10 | 1196509 | -7 |
| CNV10M | PF10_0286 | 10 | 1198927 | -8 |
| CNV10M | PF10_0287 | 10 | 1201645 | -6 |
| CNV10M | PF10_0287 | 10 | 1201645 | 0  |
| CNV10M | PF10_0288 | 10 | 1204552 | -8 |
| CNV10M | PF10_0290 | 10 | 1209379 | 0  |
| CNV10M | PF10_0291 | 10 | 1212313 | -8 |
| CNV10M | PF10_0292 | 10 | 1219893 | -8 |
| CNV10M | PF10_0293 | 10 | 1223769 | -3 |
| CNV10M | PF10_0294 | 10 | 1226804 | -8 |
| CNV10M | PF10_0295 | 10 | 1231199 | -8 |
| CNV10M | PF10_0296 | 10 | 1235333 | -8 |
| CNV10N | PF10_0325 | 10 | 1340193 | 3  |
| CNV10O | PF10_0327 | 10 | 1345522 | 2  |
| CNV10P | PF10_0330 | 10 | 1355011 | 1  |
| CNV10Q | PF10_0342 | 10 | 1392285 | -1 |

|        |        |           |    |         |   |   |   |             |    |
|--------|--------|-----------|----|---------|---|---|---|-------------|----|
| CNV10Q |        | PF10_0343 | 10 | 1395715 |   |   | * |             | -6 |
| CNV10Q |        | PF10_0344 | 10 | 1401043 |   |   | * |             | 0  |
| CNV10R |        | PF10_0348 | 10 | 1414244 |   |   |   |             | -3 |
| CNV10S |        | PF10_0355 | 10 | 1433639 |   |   |   |             | -2 |
| CNV10T |        | PF10_0357 | 10 | 1442734 | * | * | * |             | 3  |
| CNV10U |        | PF10_0374 | 10 | 1533422 |   |   |   | Scherf1992B | -3 |
| CNV10U |        | PF10_0375 | 10 | 1549092 |   |   |   | Scherf1992B | 0  |
| CNV10U |        | PF10_0376 | 10 | 1552334 |   |   |   | Scherf1992B | 0  |
| CNV10U |        | PF10_0377 | 10 | 1554948 |   |   |   | Scherf1992B | 0  |
| CNV10U |        | PF10_0378 | 10 | 1559255 |   |   |   | Scherf1992B | 0  |
| CNV10U |        | PF10_0379 | 10 | 1563348 |   |   |   | Scherf1992B | 0  |
| CNV10U |        | PF10_0380 | 10 | 1570261 |   |   |   | Scherf1992B | 0  |
| CNV10U |        | PF10_0381 | 10 | 1574741 |   |   |   | Scherf1992B | 0  |
| CNV10U |        | PF10_0382 | 10 | 1575709 |   |   |   | Scherf1992B | 2  |
| CNV10U |        | PF10_0383 | 10 | 1582204 |   |   |   | Scherf1992B | 0  |
| CNV10U |        | PF10_0384 | 10 | 1587263 |   |   |   | Scherf1992B | -3 |
| CNV10U |        | PF10_0385 | 10 | 1587836 |   |   |   | Scherf1992B | 0  |
| CNV10U |        | PF10_0386 | 10 | 1588223 |   |   |   | Scherf1992B | 0  |
| CNV10U |        | PF10_0387 | 10 | 1588505 |   |   |   | Scherf1992B | 0  |
| CNV10U | SD10R  | PF10_0388 | 10 | 1590403 |   |   |   | Scherf1992B | 0  |
| CNV10U | SD10R  | PF10_0390 | 10 | 1591972 |   |   | * | Scherf1992B | -6 |
| CNV10U | SD10R  | PF10_0391 | 10 | 1594889 |   |   |   | Scherf1992B | 0  |
| CNV10U | SD10R  | PF10_0392 | 10 | 1597045 |   |   |   | Scherf1992B | 0  |
| CNV11A |        | PF11_0012 | 11 | 54651   |   |   | * | *           | -4 |
| CNV11A | SD11LA | PF11_0014 | 11 | 59939   |   |   | * | *           | -5 |
| CNV11A | SD11LA | PF11_0015 | 11 | 61139   |   |   |   |             | -4 |
| CNV11A | SD11LB | PF11_0023 | 11 | 80865   |   |   |   | *           | 0  |
| CNV11A | SD11LB | PF11_0024 | 11 | 83024   |   |   |   |             | 0  |
| CNV11A | SD11LB | PF11_0025 | 11 | 86024   |   |   |   |             | 0  |
| CNV11A | SD11LB | PF11_0026 | 11 | 87465   |   |   |   |             | 0  |

|         |           |    |         |   |      |   |
|---------|-----------|----|---------|---|------|---|
| CNV11A  | PF11_0034 | 11 | 106296  |   | 3    |   |
| CNV11B  | PF11_0041 | 11 | 137187  |   | 3    |   |
| CNV11C  | PF11_0066 | 11 | 240150  |   | -2   |   |
| CNV11D  | PF11_0072 | 11 | 259380  |   | 5    |   |
| CNV11E  | PF11_0092 | 11 | 346632  |   | 2    |   |
| CNV11F  | PF11_0108 | 11 | 407606  | * | 0    |   |
| CNV11F  | PF11_0109 | 11 | 410461  | * | 0    |   |
| CNV11G  | PF11_0113 | 11 | 426384  |   | 2    |   |
| CNV11I  | PF11_0124 | 11 | 456464  |   | -2   |   |
| CNV11J  | PF11_0140 | 11 | 517647  |   | 2    |   |
| CNV11K  | PF11_0161 | 11 | 581973  |   | *    | 0 |
| CNV11L  | PF11_0163 | 11 | 588784  |   | *    | 0 |
| CNV11M  | PF11_0166 | 11 | 596745  |   | 5    |   |
| CNV11N  | PF11_0192 | 11 | 706468  |   | 4    |   |
| CNV11O  | PF11_0200 | 11 | 725296  |   | 5    |   |
| CNV11P  | PF11_0217 | 11 | 793070  |   | 2    |   |
| CNV11Q  | PF11_0224 | 11 | 815853  |   | -4   |   |
| CNV11R  | PF11_0277 | 11 | 1041314 |   | +/-1 |   |
| CNV11R  | PF11_0279 | 11 | 1051291 | * | 0    |   |
| CNV11S  | PF11_0281 | 11 | 1057124 | * | 0    |   |
| CNV11T  | PF11_0301 | 11 | 1122652 |   | 7    |   |
| CNV11U  | PF11_0317 | 11 | 1182886 |   | -5   |   |
| CNV11V  | PF11_0341 | 11 | 1278990 |   | 6    |   |
| CNV11W  | PF11_0397 | 11 | 1523470 |   | 2    |   |
| CNV11X  | PF11_0416 | 11 | 1612838 |   | 8    |   |
| CNV11Y  | PF11_0447 | 11 | 1735868 |   | 7    |   |
| CNV11Z  | PF11_0457 | 11 | 1768833 | * | 0    |   |
| CNV11Z  | PF11_0458 | 11 | 1771423 | * | 0    |   |
| CNV11AA | PF11_0472 | 11 | 1824952 |   | *    | 0 |
| CNV11BB | PF11_0476 | 11 | 1830938 |   | 2    |   |

|         |           |    |         |   |      |
|---------|-----------|----|---------|---|------|
| CNV11CC | PF11_0478 | 11 | 1841148 |   | 7    |
| CNV11CC | PF11_0479 | 11 | 1848627 |   | 8    |
| CNV11CC | PF11_0480 | 11 | 1862840 |   | 8    |
| CNV11DD | PF11_0488 | 11 | 1911352 |   | 5    |
| CNV11EE | PF11_0514 | 11 | 2004880 | * | +/-2 |
| CNV12A  | PFL0170w  | 12 | 180035  |   | 2    |
| CNV12B  | PFL0180w  | 12 | 185338  |   | 4    |
| CNV12C  | PFL0210c  | 12 | 205731  |   | -3   |
| CNV12D  | PFL0465c  | 12 | 430682  |   | 3    |
| CNV12E  | PFL0555c  | 12 | 494634  |   | 3    |
| CNV12F  | PFL0615w  | 12 | 550393  |   | 5    |
| CNV12G  | PFL1130c  | 12 | 953999  | * | 0    |
| CNV12G  | PFL1135c  | 12 | 965052  | * | 0    |
| CNV12H  | PFL1155w  | 12 | 974949  |   | -7   |
| CNV12I  | PFL1370w  | 12 | 1149777 |   | 4    |
| CNV12J  | PFL1395c  | 12 | 1174363 |   | -3   |
| CNV12K  | PFL1465c  | 12 | 1252360 |   | -3   |
| CNV12L  | PFL1605w  | 12 | 1377456 |   | 4    |
| CNV12M  | PFL1690w  | 12 | 1460647 |   | -6   |
| CNV12N  | PFL1780w  | 12 | 1533189 |   | -6   |
| CNV12O  | PFL2065c  | 12 | 1809238 |   | -5   |
| CNV12P  | PFL2130w  | 12 | 1861740 |   | -2   |
| CNV12Q  | PFL2255w  | 12 | 1947811 |   | 3    |
| CNV12R  | PFL2360w  | 12 | 2010645 | * | 0    |
| CNV12S  | PFL2405c  | 12 | 2049735 | * | 0    |
| CNV12T  | PFL2435w  | 12 | 2076140 |   | 2    |
| CNV12U  | PFL2455w  | 12 | 2089838 |   | -5   |
| CNV12V  | PFL2545c  | 12 | 2162806 |   | 1    |
| CNV12V  | PFL2550w  | 12 | 2168987 | * | 0    |
| CNV12V  | PFL2555w  | 12 | 2171829 | * | 0    |

|        |             |    |         |   |   |         |      |
|--------|-------------|----|---------|---|---|---------|------|
| CNV12V | PFL2565w    | 12 | 2175691 | * | * | *       | 0    |
| CNV12V | PFL2570w    | 12 | 2181627 | * | * | *       | 0    |
| CNV12V | PFL2575c    | 12 | 2183799 |   | * |         | -2   |
| CNV12V | PFL2580w    | 12 | 2189168 | * | * |         | 0    |
| CNV12V | PFL2590w    | 12 | 2196623 |   |   | *       | -6   |
| CNV12V | PFL2595w    | 12 | 2199226 |   |   |         | -3   |
| CNV13A | MAL13P1.6   | 13 | 60738   |   |   | Lavazec | 0    |
| CNV13A | MAL13P1.11  | 13 | 69051   |   |   |         | -3   |
| CNV13B | PF13_0073   | 13 | 83471   |   |   |         | 3    |
| CNV13B | MAL13P1.59  | 13 | 86197   |   |   |         | -2   |
| CNV13C | MAL13P1.14  | 13 | 147888  |   |   |         | 6    |
| CNV13D | MAL13P1.15  | 13 | 158663  |   |   |         | 3    |
| CNV13E | PF13_0022   | 13 | 242512  |   |   |         | -2   |
| CNV13F | PF13_0036   | 13 | 332245  |   |   |         | 3    |
| CNV13G | PF13_0063   | 13 | 490970  |   |   |         | -2   |
| CNV13H | MAL13P1.66  | 13 | 560838  |   |   |         | 2    |
| CNV13G | PF13_0082   | 13 | 623405  |   |   |         | +/-4 |
| CNV13H | MAL13P1.84  | 13 | 669755  |   |   |         | +/-3 |
| CNV13I | MAL13P1.87  | 13 | 699272  |   |   |         | 4    |
| CNV13J | MAL13P1.97  | 13 | 767304  |   |   |         | -2   |
| CNV13K | MAL13P1.107 | 13 | 824509  |   |   |         | -5   |
| CNV13L | PF13_0138   | 13 | 1022224 |   |   |         | 3    |
| CNV13M | PF13_0146   | 13 | 1073648 |   |   |         | 2    |
| CNV13N | MAL13P1.162 | 13 | 1277766 |   |   |         | -2   |
| CNV13O | PF13_0173   | 13 | 1334144 |   |   |         | 4    |
| CNV13O | PF13_0174   | 13 | 1336845 |   |   |         | +/-2 |
| CNV13P | MAL13P1.176 | 13 | 1433842 |   |   |         | 5    |
| CNV13P | PF13_0198   | 13 | 1445780 |   |   |         | 5    |
| CNV13Q | MAL13P1.217 | 13 | 1721027 |   |   |         | +/-2 |
| CNV13R | MAL13P1.261 | 13 | 2064372 |   |   |         | 5    |

|        |             |    |         |             |    |
|--------|-------------|----|---------|-------------|----|
| CNV13S | PF13_0275   | 13 | 2121104 |             | -5 |
| CNV13T | PF13_0288   | 13 | 2175584 |             | 7  |
| CNV13U | PF13_0304   | 13 | 2262816 |             | -4 |
| CNV13V | MAL13P1.297 | 13 | 2390181 |             | 2  |
| CNV13W | PF13_0347   | 13 | 2631686 |             | -2 |
| CNV13X | PF13_0358   | 13 | 2722142 |             | 4  |
| CNV13Y | PF13_0361   | 13 | 2771872 |             | 2  |
| CNV13Z | MAL13P1.480 | 13 | 2818215 | Wellems1987 | -3 |
| CNV14A | PF14_0009   | 14 | 30547   | *           | -6 |
| CNV14B | PF14_0016   | 14 | 53574   |             | -5 |
| CNV14C | PF14_0034   | 14 | 134577  |             | 3  |
| CNV14D | PF14_0037   | 14 | 144323  |             | -2 |
| CNV14E | PF14_0082   | 14 | 320568  |             | 3  |
| CNV14F | PF14_0087   | 14 | 354202  |             | -2 |
| CNV14G | PF14_0101   | 14 | 410357  |             | 6  |
| CNV14H | PF14_0105   | 14 | 430276  |             | 2  |
| CNV14I | PF14_0134   | 14 | 539353  |             | 2  |
| CNV14J | PF14_0144   | 14 | 591406  |             | -2 |
| CNV14K | PF14_0230   | 14 | 974640  |             | -3 |
| CNV14L | PF14_0260   | 14 | 1103115 |             | -1 |
| CNV14M | PF14_0265   | 14 | 1127979 |             | -3 |
| CNV14N | PF14_0268   | 14 | 1136965 |             | -2 |
| CNV14O | PF14_0274   | 14 | 1165391 |             | -1 |
| CNV14P | PF14_0277   | 14 | 1173003 |             | -4 |
| CNV14Q | PF14_0336   | 14 | 1436605 |             | 1  |
| CNV14R | PF14_0374   | 14 | 1610257 |             | -3 |
| CNV14S | PF14_0473   | 14 | 2039774 |             | -2 |
| CNV14T | PF14_0482   | 14 | 2079356 |             | 2  |
| CNV14U | PF14_0490   | 14 | 2113719 |             | -2 |
| CNV14V | PF14_0558   | 14 | 2402899 |             | 5  |

|         |           |    |         |   |   |    |
|---------|-----------|----|---------|---|---|----|
| CNV14W  | PF14_0563 | 14 | 2421813 |   |   | -1 |
| CNV14X  | PF14_0576 | 14 | 2462149 |   |   | 3  |
| CNV14Y  | PF14_0653 | 14 | 2813652 |   |   | 5  |
| CNV14Z  | PF14_0656 | 14 | 2829129 |   |   | 5  |
| CNV14AA | PF14_0666 | 14 | 2865571 | * |   | 0  |
| CNV14AA | PF14_0667 | 14 | 2867207 | * |   | 0  |
| CNV14BB | PF14_0669 | 14 | 2878324 |   |   | -1 |
| CNV14CC | PF14_0732 | 14 | 3139996 | * | * | 0  |
| CNV14CC | PF14_0733 | 14 | 3142633 | * | * | 0  |
| CNV14CC | PF14_0734 | 14 | 3143851 | * | * | 0  |
| CNV14CC | PF14_0735 | 14 | 3147972 |   |   | 5  |
| CNV14DD | PF14_0747 | 14 | 3196317 | * | * | -1 |
| CNV14EE | PF14_0764 | 14 | 3263807 |   |   | -3 |

<sup>a</sup> Named according to chromosome number in ascending letter from left to right for CNVs and left (L) or right (R) arm for SDs. Significant genes that were adjacent to other significant genes in this study or previously published CNVs were assigned the same CNV name.

<sup>b</sup> According to PlasmDB Version 5.5.

<sup>c</sup> Marked as a \* if they were recorded in the CGH studies indicated by the column heading. Kidgell, [1]; Ribacke, [2]; Bozdech, [3]; Carret, [4].

<sup>d</sup> Marked by the study name where they were recorded. Pologe1988, [5]; Pologe1990, [6]; Scherf1992A, [7]; Scherf1992B, [8], Petersen1989, [9]; Lavazec, [10]; Wellems, [11]; Spielmann, [12]

<sup>e</sup> Defined as a CNV from the data in this study if significant variation between field strains in CGH data ( $P < 0.001$ ,  $> 1.5$ -fold difference from 3D7 in at least 2 field strains). +/- n indicates the number of strains (n) different from 3D7 and the direction of these differences.

Note: Since this table was constructed, three more studies on CNVs in laboratory isolates have been published [13–15]. Their results are not included here.



## References for Table S2

1. Kidgell C, Volkman SK, Daily JP, Borevitz JO, Plouffe D et al. (2006) A systematic map of genetic variation in *Plasmodium falciparum*. PLoS Pathog 2: e57.
2. Ribacke U, Mok BW, Wirta V, Normark J, Lundeberg J et al. (2007) Genome wide gene amplifications and deletions in *Plasmodium falciparum*. Mol Biochem Parasitol 155: 33-44.
3. Bozdech Z, Llinas M, Pulliam BL, Wong ED, Zhu JC et al. (2003) The transcriptome of the intraerythrocytic developmental cycle of *Plasmodium falciparum*. PLoS Biol 1: 85-100.
4. Carret CK, Horrocks P, Konfortov B, Winzeler EA, Qureshi M et al. (2005) Microarray-based comparative genomic analyses of the human malaria parasite *Plasmodium falciparum* using Affymetrix arrays. Mol Biochem Parasitol 144: 177-186.
5. Pologe LG, Ravetch JV (1988) Large deletions result from breakage and healing of *P. falciparum* chromosomes. Cell 55: 869-874.
6. Pologe LG, de Bruin D, Ravetch JV (1990) A and T homopolymeric stretches mediate a DNA inversion in *Plasmodium falciparum* which results in loss of gene expression. Mol Cell Biol 10: 3243-3246.
7. Scherf A, Mattei D (1992) Cloning and characterization of chromosome breakpoints of *Plasmodium falciparum*: breakage and new telomere formation occurs frequently and randomly in subtelomeric genes. Nucleic Acids Res 20: 1491-1496.
8. Scherf A, Carter R, Petersen C, Alano P, Nelson R et al. (1992) Gene inactivation of Pf11-1 of *Plasmodium falciparum* by chromosome breakage and healing: identification of a gametocyte-specific protein with a potential role in gametogenesis. EMBO J 11: 2293-2301.
9. Petersen C, Nelson R, Magowan C, Wollish W, Jensen J et al. (1989) The mature erythrocyte surface antigen of *Plasmodium falciparum* is not required for knobs or cytoadherence. Mol Biochem Parasitol 36: 61-65.
10. Lavazec C, Sanyal S, Templeton TJ (2007) Expression switching in the stevor and Pfmc-2TM superfamilies in *Plasmodium falciparum*. Mol Microbiol 64: 1621-1634.
11. Wellems TE, Walliker D, Smith CL, Rosario VE, Maloy WL et al. (1987) A histidine-rich protein gene marks a linkage group favored strongly in a genetic cross of *Plasmodium falciparum*. Cell 49: 633-642.
12. Spielmann T, Hawthorne PL, Dixon MW, Hannemann M, Klotz K et al. (2006) A cluster of ring stage-specific genes linked to a locus implicated in cytoadherence in *Plasmodium falciparum* codes for PEXEL-negative and PEXEL-positive proteins exported into the host cell. Mol Biol Cell 17: 3613-3624.
13. Jiang H, Yi M, Mu J, Zhang L, Ivens A et al. (2008) Detection of genome-wide polymorphisms in the AT-rich *Plasmodium falciparum* genome using a high-density microarray. BMC Genomics 9: 398.

14. Cheeseman IH, Gomez-Escobar N, Carret CK, Ivens A, Stewart LB et al. (2009) Gene copy number variation throughout the *Plasmodium falciparum* genome. BMC Genomics 10: 353.
15. Dharia NV, Sidhu AB, Cassera MB, Westenberger SJ, Bopp SE et al. (2009) Use of high-density tiling microarrays to identify mutations globally and elucidate mechanisms of drug resistance in *Plasmodium falciparum*. Genome Biol 10: R21.
